# Supplementary material for: Transcriptome analysis reveals the host selection fitness mechanisms of the Rhizoctonia solani AG1IA pathogen
Source: PubMed Central journal article supplement (PMC5579035; doi:10.1038/s41598-017-10804-1), 2017-08-31
Supplement: 41598_2017_10804_MOESM1_ESM.pdf [file 41598_2017_10804_MOESM1_ESM.pdf]

**Transcriptome analysis reveals the host selection fitness mechanisms of the *Rhizoctonia solani* AG1IA  
pathogen**

**Yuan Xia<sup>1</sup>, Binghong Fei<sup>1</sup>, Jiayu He<sup>1</sup>, Menglin Zhou<sup>1</sup>, Danhua Zhang<sup>1</sup>, Linxiu Pan<sup>1</sup>, Shuangcheng Li<sup>1,3</sup>, Yueyang Liang<sup>1,3</sup>, Lingxia Wang<sup>1,3</sup>,  
Jianqing Zhu<sup>1,3</sup>, Ping Li<sup>1,3</sup> and Aiping Zheng<sup>1,2</sup>**

<sup>1</sup>Rice Research Institute of Sichuan Agricultural University, Chengdu 611130, China, <sup>2</sup>Key Laboratory of Sichuan Crop Major Diseases, Sichuan Agricultural University, Chengdu 611130, China. <sup>3</sup>Key Laboratory of Southwest Corp Gene Resource and Genetic Improvement of Ministry of Education, Sichuan Agricultural University, Ya'an, 625014, China.

Author for correspondence: apzh0602@gmail.com

### Supplementary tables

| <b>Samples</b> | <b>Total reads</b> | <b>Total base(bp)</b> | <b>GC%</b> | <b>Q20</b> | <b>Q30</b> |
|----------------|--------------------|-----------------------|------------|------------|------------|
| R0             | 14,714,110         | 3,704,361,594         | 52.88      | 92.42      | 92.42      |
| R-R            | 11,702,595         | 2,946,184,392         | 51.72      | 91.77      | 86.81      |
| M-M            | 12,366,055         | 3,113,631,011         | 52.63      | 92.31      | 87.41      |
| M0             | 13,479,284         | 3,393,042,636         | 52.4       | 91.58      | 86.34      |
| M-R            | 13,174,572         | 3,316,479,415         | 52.66      | 92.03      | 86.95      |
| S-S            | 14,144,703         | 3,560,675,097         | 51.64      | 91.73      | 86.43      |
| S0             | 13,293,517         | 3,344,583,075         | 52.38      | 91.86      | 86.82      |
| S-R            | 12,096,744         | 3,044,104,095         | 52.66      | 92.26      | 87.35      |

**Table S1. Original sequencing data evaluation.**

| <b>Statistical content</b> | <b>Statistical content</b> | <b>Total reads</b> | <b>Mapped reads</b> | <b>Unique mapped reads</b> | <b>Multiple mapped reads</b> | <b>Pair mapped reads</b> | <b>Single mapped reads</b> |
|----------------------------|----------------------------|--------------------|---------------------|----------------------------|------------------------------|--------------------------|----------------------------|
| R0                         | Number                     | 29,428,220         | 23,338,124          | 23,072,089                 | 266,035                      | 20,677,317               | 2,467,739                  |
|                            | Percentage                 | 100%               | 79.31%              | 98.86%                     | 1.14%                        | 88.60%                   | 10.57%                     |
| R-R                        | Number                     | 23,405,190         | 18,354,846          | 18,088,818                 | 266,028                      | 16,195,604               | 1,996,940                  |
|                            | Percentage                 | 100%               | 78.42%              | 98.55%                     | 1.45%                        | 88.24%                   | 10.88%                     |
| M-M                        | Number                     | 24732110           | 18383840            | 18196151                   | 187689                       | 16020736                 | 2242824                    |
|                            | Percentage                 | 100%               | 74.33%              | 98.98%                     | 1.02%                        | 87.15%                   | 12.20%                     |
| M0                         | Number                     | 26958568           | 19754216            | 19557018                   | 197198                       | 17179302                 | 2426538                    |
|                            | Percentage                 | 100%               | 73.28%              | 99.00%                     | 1.00%                        | 86.97%                   | 12.28%                     |
| M-R                        | Number                     | 26349144           | 19456535            | 19229635                   | 226900                       | 17019263                 | 2315409                    |

|     |            |          |          |          |        |          |         |
|-----|------------|----------|----------|----------|--------|----------|---------|
| S-S | Percentage | 100%     | 73.84%   | 98.83%   | 1.17%  | 87.47%   | 11.90%  |
|     | Number     | 28289406 | 19594330 | 19303935 | 290395 | 16733805 | 2715249 |
| S0  | Percentage | 100%     | 69.26%   | 98.52%   | 1.48%  | 85.40%   | 13.86%  |
|     | Number     | 26587034 | 18329513 | 18145815 | 183698 | 15580823 | 2621432 |
| S-R | Percentage | 100%     | 68.94%   | 99.00%   | 1.00%  | 85.00%   | 14.30%  |
|     | Number     | 24193488 | 17013843 | 16775483 | 238360 | 14522443 | 2377085 |
|     | Percentage | 100%     | 70.32%   | 98.60%   | 1.40%  | 85.36%   | 13.97%  |

**Table S2. Transcriptome reads mapped to *Rhizoctonia solani* AG1 IA genome**

| Annotation           | Database | Annotated_Number | 300<=length<1000 | length>=1000 |
|----------------------|----------|------------------|------------------|--------------|
| COG_Annotation       |          | 496              | 178              | 312          |
| GO_Annotation        |          | 495              | 184              | 300          |
| KEGG_Annotation      |          | 230              | 75               | 123          |
| Swissprot_Annotation |          | 764              | 270              | 485          |
| nr_Annotation        |          | 1565             | 630              | 906          |
| All_Annotated        |          | 1565             | 630              | 906          |

**Table S3. Numbers of functional annotation of novel genes**

| Sample | R-R | R0 | M-M | M0 | M-R | S-S | S0 | S-R |
|--------|-----|----|-----|----|-----|-----|----|-----|
|--------|-----|----|-----|----|-----|-----|----|-----|

|                   |       |       |       |       |       |       |       |       |
|-------------------|-------|-------|-------|-------|-------|-------|-------|-------|
| Alt3' splice site | 2159  | 1951  | 2050  | 2020  | 2074  | 1939  | 2075  | 1998  |
| Alt5' splice site | 1933  | 1813  | 1819  | 1846  | 1837  | 1789  | 1840  | 1813  |
| AltFirstExon      | 392   | 373   | 385   | 360   | 388   | 401   | 364   | 390   |
| AltLastExon       | 369   | 306   | 362   | 366   | 357   | 360   | 411   | 366   |
| IntronRetention   | 4517  | 4782  | 4417  | 4474  | 4556  | 4331  | 4459  | 4357  |
| skippedExon       | 1971  | 1805  | 1838  | 1920  | 1914  | 1799  | 1871  | 1870  |
| total_AS events   | 11341 | 11030 | 10871 | 10986 | 11126 | 10619 | 11020 | 10794 |

**Table S4. Number of each type of alternative splicing events in eight transcriptomes**

| Sample            | R-R    | R0     | M-M    | M0     | M-R    | S-S    | S0     | S-R    |
|-------------------|--------|--------|--------|--------|--------|--------|--------|--------|
| Alt3' splice site | 301    | 277    | 285    | 307    | 263    | 249    | 281    | 260    |
| Alt5' splice site | 282    | 247    | 250    | 253    | 254    | 243    | 259    | 247    |
| AltFirstExon      | 45     | 54     | 46     | 50     | 56     | 49     | 60     | 51     |
| AltLastExon       | 63     | 48     | 56     | 51     | 49     | 54     | 71     | 63     |
| IntronRetention   | 577    | 656    | 557    | 607    | 571    | 544    | 571    | 549    |
| skippedExon       | 250    | 236    | 224    | 257    | 244    | 220    | 236    | 256    |
| total_AS genes    | 1518   | 1518   | 1418   | 1525   | 1437   | 1359   | 1478   | 1426   |
| proportion        | 17.42% | 17.36% | 16.02% | 17.18% | 16.10% | 15.10% | 16.53% | 15.60% |

**Table S5. Comparison of AS distribution in predicted critical pathogenesis-associated genes.** The proportion indicates the percentage of critical pathogenesis-associated alternative spliced genes during different host infection.

| Gene ID     | Sample | Nr_annotation                       | AS type    |
|-------------|--------|-------------------------------------|------------|
| AG1IA_04402 | R-R    | 2-deoxy-D-gluconate 3-dehydrogenase | Alt5' site |
|             | M-M    |                                     | Alt5' site |
|             | M-R    |                                     | Alt5' site |

|             |     |                                           |                 |             |
|-------------|-----|-------------------------------------------|-----------------|-------------|
|             | S-S |                                           | AltFirstExon    |             |
|             | S-R |                                           | Alt5' site      |             |
|             | R-R |                                           | Alt5' site      | Alt5' site  |
|             |     |                                           | IntronRetention | skippedExon |
|             |     |                                           | Alt5' site      | Alt5' site  |
| AG1IA_00285 | M-M | cytochrome P450 domain-containing protein | skippedExon     |             |
|             | M-R |                                           | IntronRetention | skippedExon |
|             | S-S |                                           | skippedExon     |             |
|             | S-R |                                           | skippedExon     |             |
|             | R-R |                                           | IntronRetention |             |
|             | M-M |                                           | IntronRetention |             |
| AG1IA_09291 | M-R | glycoside hydrolase family 16 protein     | IntronRetention |             |
|             | S-S |                                           | IntronRetention |             |
|             | S-R |                                           | IntronRetention |             |
|             | R-R |                                           | Alt5' site      |             |
|             | M-M |                                           | Alt5' site      |             |
| AG1IA_09535 | M-R | efhand domain-containing protein          | Alt5' site      | skippedExon |
|             | S-S |                                           | Alt5' site      |             |
|             | S-R |                                           | Alt5' site      | skippedExon |
|             | R-R |                                           | IntronRetention | Alt3' site  |
|             | M-M |                                           | IntronRetention | Alt3' site  |
| AG1IA_04262 | M-R | MFS_1 domain-containing protein           | IntronRetention | Alt3' site  |
|             | S-S |                                           | IntronRetention | Alt3' site  |
|             | S-R |                                           | IntronRetention |             |
|             | R-R |                                           | IntronRetention |             |
| AG1IA_01513 | M-M | hypothetical protein                      | IntronRetention |             |

|             |                 |                                                         |                 |              |
|-------------|-----------------|---------------------------------------------------------|-----------------|--------------|
| AG1IA_06281 | M-R             | IncA domain-containing protein                          | IntronRetention |              |
|             | S-S             |                                                         | IntronRetention |              |
|             | S-R             |                                                         | IntronRetention |              |
|             | R-R             |                                                         | IntronRetention |              |
|             | M-M             |                                                         | IntronRetention |              |
|             | M-R             |                                                         | IntronRetention |              |
|             | S-S             |                                                         | IntronRetention |              |
|             | S-R             |                                                         | IntronRetention |              |
| AG1IA_00042 | R-R             | sugar (and other) transporter domain-containing protein | IntronRetention | Alt3' site   |
|             |                 |                                                         | skippedExon     |              |
|             | M-M             |                                                         | IntronRetention | Alt3' site   |
|             |                 |                                                         | skippedExon     |              |
|             | M-R             |                                                         | IntronRetention | AltFirstExon |
|             |                 |                                                         | skippedExon     | Alt3' site   |
|             |                 |                                                         | AltLastExon     |              |
|             | S-S             |                                                         | IntronRetention | skippedExon  |
| S-R         | IntronRetention | Alt3' site                                              |                 |              |
|             | AltLastExon     | skippedExon                                             |                 |              |

**Table S6. Commonly alternative spliced genes under all host infection conditions.**

| Gene ID     | R0 FPKM  | R-R FPKM | M0 FPKM   | M-R FPKM | M-M FPKM | S0 FPKM  | S-R FPKM | S-S FPKM |
|-------------|----------|----------|-----------|----------|----------|----------|----------|----------|
| AG1IA_00058 | 14.6511  | 7.27246  | 6.62856   | 3.89001  | 2.79449  | 25.0217  | 2.84238  | 3.10135  |
| AG1IA_00157 | 153.2838 | 92.4913  | 22.995937 | 23.68    | 24.10202 | 124.7511 | 43.764   | 63.1699  |
| AG1IA_00192 | 32.60532 | 36.32015 | 34.39902  | 40.0529  | 30.81672 | 39.13962 | 38.56928 | 99.6494  |
| AG1IA_00273 | 0.975175 | 26.7059  | 8.70984   | 18.0522  | 21.1686  | 22.741   | 9.31206  | 68.3488  |

|             |             |            |             |             |             |             |            |             |
|-------------|-------------|------------|-------------|-------------|-------------|-------------|------------|-------------|
| AG1IA_00396 | 55.8657     | 16.27326   | 26.314545   | 16.161258   | 23.23721    | 23.262473   | 14.047     | 22.81639    |
| AG1IA_00550 | 31.2993     | 20.2479    | 13.4835     | 16.4411     | 21.4966     | 20.9484     | 22.4789    | 75.7371     |
| AG1IA_00669 | 530.66628   | 325.55722  | 200.191     | 187.916     | 282.94709   | 282.73619   | 140.45324  | 81.799969   |
| AG1IA_00748 | 20.7749643  | 17.224763  | 24.858411   | 16.722081   | 20.7908434  | 14.703211   | 7.342422   | 9.865729    |
| AG1IA_00879 | 228.3126    | 196.20316  | 161.3733489 | 142.4623    | 147.23119   | 132.8096    | 104.24613  | 56.97752    |
| AG1IA_00925 | 223.259621  | 1314.55997 | 757.968283  | 1014.672497 | 1265.229236 | 710.19516   | 1600.83864 | 1173.45717  |
| AG1IA_01042 | 0.383168    | 20.305173  | 4.73197     | 6.6521      | 13.35267    | 17.97448    | 22.75454   | 115.87259   |
| AG1IA_01137 | 308.0938    | 542.228    | 633.377     | 494.838     | 1270.814    | 496.327     | 1284.583   | 903.375     |
| AG1IA_01512 | 41.8685     | 27.81397   | 31.2917     | 25.21925    | 29.98825    | 20.82541    | 40.448     | 46.3435     |
| AG1IA_01604 | 70.4311     | 256.783    | 178.641     | 125.167     | 192.844     | 326.466183  | 193.145    | 256.012718  |
| AG1IA_01632 | 8.04841     | 6.98022    | 15.60996    | 27.39766    | 14.76294    | 15.94215    | 7.00799    | 9.46533     |
| AG1IA_01647 | 8.31628     | 17.0302    | 15.6174     | 16.4019     | 20.8763     | 18.5137     | 20.491     | 22.111      |
| AG1IA_01812 | 17.5474     | 8.82254    | 16.8445     | 16.6231     | 16.0928     | 10.91587    | 43.1211    | 86.9936     |
| AG1IA_02024 | 11.7822     | 6.56882    | 8.72049     | 8.40775     | 9.05104     | 4.32121     | 19.421     | 10.5321     |
| AG1IA_02138 | 65.02996    | 120.59864  | 111.62953   | 145.6184    | 152.5003    | 137.84613   | 163.78005  | 66.90129    |
| AG1IA_02188 | 36.0703     | 36.375     | 30.714      | 29.2736     | 26.8847     | 33.8135     | 37.7017    | 77.4341     |
| AG1IA_02358 | 27.1721     | 5.35594    | 7.02617     | 4.37648     | 5.3791      | 6.62649     | 5.39134    | 6.59631     |
| AG1IA_02386 | 8.077       | 2.82103    | 5.73554     | 4.12429     | 4.70911     | 1.75989     | 4.14676    | 2.6197      |
| AG1IA_02874 | 88.8716     | 38.9206    | 20.599715   | 18.80501    | 15.7787     | 25.03009    | 27.28923   | 76.1832     |
| AG1IA_02928 | 37.02895    | 18.99869   | 33.91192    | 8.781994    | 12.909439   | 33.61054654 | 6.12291275 | 12.24763712 |
| AG1IA_02940 | 5.740342    | 10.352061  | 141.079684  | 24.15545    | 20.24686    | 18.481737   | 25.375485  | 5.569006    |
| AG1IA_03245 | 4.28978     | 8.99907    | 8.44859     | 6.99196     | 8.64658     | 12.9581     | 9.20884    | 6.59426     |
| AG1IA_03763 | 1.960376    | 1.5384     | 0.946286    | 0.619728    | 0.917254    | 0.834423    | 2.05219    | 3.47325     |
| AG1IA_03834 | 85.67403089 | 99.41817   | 90.413895   | 116.5071    | 115.22809   | 107.119194  | 100.17772  | 314.80959   |

|             |            |             |             |           |           |             |           |             |
|-------------|------------|-------------|-------------|-----------|-----------|-------------|-----------|-------------|
| AG1IA_04006 | 669.722    | 175.497     | 44.7738     | 87.4342   | 38.9683   | 85.2841     | 70.1771   | 132.825     |
| AG1IA_04144 | 735.12873  | 339.89873   | 475.5496    | 255.68898 | 215.2577  | 313.4746121 | 222.75856 | 82.37355438 |
| AG1IA_04237 | 25.8462    | 3.36074     | 14.80215    | 3.036583  | 3.82669   | 6.92131     | 1.606893  | 14.00578    |
| AG1IA_04497 | 6.63837    | 8.98644     | 10.4354     | 10.9383   | 18.7853   | 9.58512     | 11.3816   | 43.6471     |
| AG1IA_04714 | 23.718     | 37.0131     | 25.0757     | 43.5326   | 37.9557   | 60.2832     | 29.3458   | 86.9279     |
| AG1IA_04889 | 56.8993    | 48.85625    | 95.5903     | 50.71931  | 43.22839  | 78.2033     | 22.92902  | 17.14699    |
| AG1IA_04923 | 3.07341    | 4.39288     | 1.76134     | 2.67074   | 1.85283   | 9.32985     | 3.59326   | 2.5948      |
| AG1IA_04998 | 64.1409    | 178.00587   | 220.63455   | 246.76624 | 269.32505 | 132.81132   | 278.42823 | 335.44632   |
| AG1IA_05179 | 1.5338     | 0.860656    | 1.65766     | 0.753362  | 0.367774  | 0.675542    | 6.04582   | 2.18101     |
| AG1IA_05291 | 29.011     | 36.5826     | 33.8192     | 112.545   | 50.6306   | 120.723     | 126.412   | 72.316      |
| AG1IA_05454 | 4221.182   | 1331.7781   | 1596.698    | 2096.811  | 2639.125  | 2403.823    | 2259.191  | 4266.164    |
| AG1IA_05500 | 895.99     | 1477.814    | 477.736     | 874.498   | 935.689   | 414.777     | 430.397   | 185.5044    |
| AG1IA_05506 | 25.918     | 6.40453     | 9.324487    | 12.56     | 8.6646    | 9.26979     | 13.0412   | 27.3191     |
| AG1IA_05880 | 64.25      | 24.6955     | 25.0875     | 27.9003   | 46.9424   | 112.908854  | 75.31191  | 24.5879     |
| AG1IA_05955 | 16.9079    | 65.6027     | 43.0483     | 56.3306   | 37.7554   | 73.2405     | 41.4316   | 30.264      |
| AG1IA_06272 | 53.99179   | 252.5603    | 166.92256   | 218.04269 | 227.26189 | 198.3696601 | 250.18288 | 264.6091519 |
| AG1IA_06325 | 868.57705  | 922.3337148 | 694.9023    | 1027.2429 | 833.482   | 1294.2517   | 1317.604  | 2782.853    |
| AG1IA_06385 | 761.4265   | 795.82224   | 608.05112   | 619.82165 | 294.06928 | 802.302153  | 428.2674  | 264.16141   |
| AG1IA_06394 | 12.6275    | 60.8778     | 25.7054     | 53.7219   | 82.2022   | 83.004      | 53.6139   | 42.3979     |
| AG1IA_06428 | 2.65653    | 1.11427     | 3.10306     | 1.56705   | 1.27738   | 2.285664    | 2.48251   | 4.27235     |
| AG1IA_06613 | 1834.24191 | 3928.959    | 2640.69     | 2885.857  | 4236.7732 | 4604.26     | 5394.319  | 3148.55     |
| AG1IA_06668 | 50.8977    | 4.39969     | 0           | 4.24686   | 3.65772   | 0           | 0.349262  | 0           |
| AG1IA_06710 | 1.70773    | 0.836859    | 0           | 0         | 0         | 3.57972     | 1.07029   | 5.00146     |
| AG1IA_06725 | 32.2231    | 36.0311     | 11.75254466 | 13.4785   | 12.747    | 30.743393   | 11.2523   | 19.80304    |



|             |             |             |             |             |             |             |            |             |
|-------------|-------------|-------------|-------------|-------------|-------------|-------------|------------|-------------|
| AG1IA_06741 | 2.43938     | 3.9082      | 5.95084     | 3.8718      | 5.17412     | 1.9805      | 1.45979    | 8.75349     |
| AG1IA_06958 | 59.312684   | 5.676357    | 29.07027    | 5.844851    | 9.301868    | 26.77631    | 42.349847  | 9.5887      |
| AG1IA_07075 | 81.95943    | 75.64224    | 24.72412    | 31.23134    | 57.21704    | 19.481      | 12.3105    | 69.06348    |
| AG1IA_07262 | 1.60914     | 1.46884     | 0.944937    | 0.078609    | 1.04245     | 0.401205    | 1.14167    | 4.02148     |
| AG1IA_07267 | 4.92714131  | 12.00052    | 7.594365868 | 8.773099933 | 10.538      | 13.39043683 | 9.64843    | 6.11922409  |
| AG1IA_07280 | 212.8462    | 731.657     | 403.095     | 621.781     | 694.299     | 639.543     | 506.476    | 306.202     |
| AG1IA_07307 | 0           | 0           | 4.25074     | 3.86958     | 0           | 10.1072     | 8.72118    | 80.875      |
| AG1IA_07357 | 10.5112     | 3.37805     | 0           | 1.91249     | 0.00128761  | 1.19312     | 13.4289    | 18.2585     |
| AG1IA_07490 | 45.143887   | 14.36346    | 19.143671   | 16.620335   | 16.46599    | 20.21557    | 23.944156  | 27.326866   |
| AG1IA_07563 | 71.128873   | 36.7288     | 49.4138     | 23.50333    | 16.132633   | 193.9792    | 36.6503    | 50.163      |
| AG1IA_07627 | 222.349     | 242.344     | 297.008     | 264.12      | 245.273     | 287.6367916 | 254.942389 | 774.252     |
| AG1IA_07806 | 17.2402     | 18.4556     | 27.3742     | 29.4478     | 67.9142     | 26.5383     | 57.3327    | 34.6605     |
| AG1IA_07973 | 550.8287    | 1901.51301  | 224.23868   | 1203.606    | 725.929     | 104.17961   | 436.281145 | 213.50576   |
| AG1IA_07977 | 220.47399   | 275.4717    | 123.57722   | 293.4569    | 229.7352    | 143.8183    | 209.4137   | 211.3687    |
| AG1IA_07978 | 60.416404   | 151.84285   | 19.5052     | 69.05649    | 39.481353   | 34.476962   | 121.725963 | 36.4046     |
| AG1IA_08059 | 400.3862922 | 294.5575838 | 281.74058   | 308.5501588 | 229.2609016 | 238.7085412 | 401.080338 | 511.5099399 |
| AG1IA_08303 | 36.2532     | 170.0447    | 0.2723143   | 1.657252    | 0.146395    | 214.4635    | 540.809    | 532.687     |
| AG1IA_08310 | 18.7408     | 7.745956    | 18.213424   | 6.9873      | 8.731188    | 8.34489     | 10.202587  | 5.39085     |
| AG1IA_08405 | 32.74519222 | 82.54377736 | 40.45593417 | 85.3663     | 62.32241    | 34.40905429 | 70.183174  | 92.125941   |
| AG1IA_08487 | 43.39285    | 60.967202   | 34.6198     | 36.263      | 63.5405     | 31.8083     | 9.75183    | 59.4161     |
| AG1IA_08488 | 15.86626    | 27.908505   | 30.311843   | 23.956699   | 25.005129   | 31.846085   | 37.401961  | 80.901562   |
| AG1IA_08493 | 7.29984     | 6.64562     | 21.2564     | 6.69727     | 10.9398     | 14.3596     | 49.4868    | 39.3804     |
| AG1IA_08580 | 18.11097    | 17.60219    | 22.38937    | 33.0509     | 23.61427    | 24.25921    | 25.78557   | 10.06844    |
| AG1IA_08615 | 35.6833     | 30.16053    | 11.90492    | 11.709891   | 7.38434     | 8.3839088   | 19.58727   | 6.528516    |

|             |             |             |           |             |            |             |             |            |
|-------------|-------------|-------------|-----------|-------------|------------|-------------|-------------|------------|
| AG1IA_08650 | 55.1698     | 48.6992     | 17.1278   | 9.02387     | 14.728     | 388.145     | 16.5117     | 7.32963    |
| AG1IA_08777 | 6.45391     | 1.032367    | 3.8635    | 2.219544    | 3.172254   | 64.6132     | 1.8998      | 3.51675    |
| AG1IA_08852 | 8.24112037  | 4.95346263  | 4.281598  | 15.573323   | 5.25308102 | 7.616356823 | 6.798016544 | 8.539497   |
| AG1IA_08891 | 0.229257    | 0.160186    | 0         | 0.186623    | 0.206541   | 0           | 0.210698    | 1.55635    |
| AG1IA_08892 | 2.34723     | 0           | 0.190372  | 0.191027    | 0.211484   | 0           | 0.215673    | 1.79223    |
| AG1IA_08957 | 4.08127     | 2.91334     | 3.88914   | 0.815692    | 3.64053    | 3.88768     | 1.64742     | 4.81634    |
| AG1IA_09055 | 6.66965     | 2.1848      | 3.87775   | 9.49395     | 6.9443     | 19.38819    | 31.2068     | 16.21232   |
| AG1IA_09060 | 8.12502     | 9.52329     | 10.75147  | 18.59956    | 73.66833   | 24.03521    | 19.21846    | 17.418943  |
| AG1IA_09202 | 57.8183     | 195.658     | 77.23661  | 221.03286   | 249.37167  | 280.95652   | 666.5236    | 565.28884  |
| AG1IA_09203 | 68.7073     | 128.574     | 49.854487 | 184.786     | 113.749    | 99.9421     | 164.353     | 68.3009    |
| AG1IA_09207 | 78.9049     | 1061.67     | 134.895   | 656.198     | 413.791    | 65.0901     | 527.969     | 548.323    |
| AG1IA_09217 | 8.95407     | 18.7201     | 15.3597   | 22.8324     | 19.1861    | 19.4493     | 15.5632     | 18.4684    |
| AG1IA_09303 | 6.892583659 | 8.70625     | 2.74558   | 5.341905866 | 10.61404   | 2.169812    | 3.02017405  | 3.7805943  |
| AG1IA_09544 | 0           | 28.25532    | 0         | 0           | 0          | 0           | 0           | 0          |
| AG1IA_09836 | 319.83227   | 169.5706453 | 261.40992 | 241.818809  | 327.31686  | 115.5117668 | 358.5839    | 813.4285   |
| AG1IA_09837 | 428.28      | 186.699     | 259.407   | 257.077731  | 224.027    | 186.27908   | 291.644     | 257.574848 |
| AG1IA_09956 | 46.2903     | 52.2652     | 98.9031   | 187.4       | 267.915    | 0           | 0           | 0          |
| AG1IA_10043 | 2917.612    | 121.6334    | 395.2834  | 11.8818     | 5.239245   | 8561.17     | 227.0672    | 93.41286   |
| AG1IA_10158 | 25.5207     | 21.3174     | 40.1037   | 27.1382     | 31.2311    | 15.8843     | 36.0448     | 35.5189    |
| AG1IA_10180 | 0.986406    | 1.83241     | 1.8675    | 0           | 0.89002    | 1.08025     | 0.601919    | 0          |
| AG1IA_10204 | 14.21       | 5.48856     | 6.40732   | 2.5519      | 5.70417    | 0.323694    | 2.16198     | 6.31978    |
| AG1IA_10318 | 1.53899     | 5.33092     | 1.66632   | 5.36161     | 9.74768    | 0           | 0           | 0          |
| AG1IA_10394 | 10.0522     | 26.8013     | 26.6842   | 21.9395     | 27.3525    | 20.2004     | 15.1247     | 13.3976    |
| AG1IA_10403 | 219.775     | 84.34814    | 265.55654 | 111.88446   | 261.82721  | 353.7865    | 106.22048   | 535.6554   |

|             |         |            |          |          |          |          |           |          |
|-------------|---------|------------|----------|----------|----------|----------|-----------|----------|
| AG1IA_10405 | 43.2796 | 65.7565    | 75.46626 | 82.50115 | 62.85795 | 57.2981  | 189.75673 | 173.655  |
| AG1IA_10423 | 23.9792 | 45.1646    | 43.7077  | 29.5254  | 38.1957  | 27.9981  | 24.5949   | 9.72641  |
| AG1IA_10444 | 33.5946 | 107.266184 | 41.2555  | 54.20202 | 50.5987  | 35.22926 | 58.21992  | 29.11024 |
| AG1IA_10485 | 71.396  | 41.9779    | 10.5627  | 16.1471  | 35.3266  | 34.0072  | 25.7471   | 14.4177  |

**Table S7. FPKM of differentially expressed candidate effectors under all host infection conditions.**

| <b>Gene ID</b>     | <b>Nr_annotation</b>                                                    |
|--------------------|-------------------------------------------------------------------------|
| <b>AG1IA_01137</b> | hypoxia induced protein conserved region domain-containing protein      |
| AG1IA_00157        | polysaccharide deacetylase domain-containing protein                    |
| <b>AG1IA_00192</b> | peptidase s24-like domain-containing protein                            |
| <b>AG1IA_02188</b> | MRP-S33 domain-containing protein                                       |
| <b>AG1IA_02874</b> | ribosomal l36 domain-containing protein                                 |
| <b>AG1IA_03245</b> | kinase domain-containing protein                                        |
| <b>AG1IA_03834</b> | LSM domain-containing protein                                           |
| AG1IA_04714        | Smr domain-containing protein                                           |
| AG1IA_05454        | B12D domain-containing protein                                          |
| <b>AG1IA_06325</b> | FKBP-type peptidyl-prolyl cis-trans isomerase domain-containing protein |
| AG1IA_06385        | extracellular elastinolytic metalloproteinase                           |
| AG1IA_00669        | glycosyl hydrolase family 61 domain-containing protein                  |
| <b>AG1IA_07075</b> | CFEM domain-containing protein                                          |
| <b>AG1IA_07280</b> | HSP70 domain-containing protein                                         |
| AG1IA_07490        | Yippee domain-containing protein                                        |
| AG1IA_07563        | erv1/alr family domain-containing protein                               |
| <b>AG1IA_07627</b> | zf-rbx1 domain-containing protein                                       |

|                    |                                                  |
|--------------------|--------------------------------------------------|
| <b>AG1IA_08303</b> | peroxidase, family 2 domain-containing protein   |
| AG1IA_08310        | DDHD domain-containing protein                   |
| <b>AG1IA_08405</b> | coenzyme A transferase domain-containing protein |
| AG1IA_08487        | Ribonuclease domain-containing protein           |
| <b>AG1IA_08488</b> | Ribonuclease domain-containing protein           |
| AG1IA_08777        | plastocyanin-like domain-containing protein      |
| <b>AG1IA_09055</b> | thaumatin-like protein                           |
| <b>AG1IA_09060</b> | thaumatin-like protein                           |
| <b>AG1IA_00925</b> | Barwin domain-containing protein                 |
| <b>AG1IA_09303</b> | subtilase family domain-containing protein       |

**Table S8. Annotation of different expressed genes in candidate effectors.** The positive training data set (experimentally verified fungal effectors) that was used for training EffectorP can be found in <http://effectorp.csiro.au/data.html>. A total of 27 genes out of 104 candidate effectors with a predicted function have been listed in table and genes which were bolded indicates up-regulated genes during host infection.

| <b>Gene ID</b> | <b>Family</b> | <b>Enzyme activity</b>                       | <b>Substrates</b> |
|----------------|---------------|----------------------------------------------|-------------------|
| AG1IA_00122    | GH9           | lichenase / endo- $\beta$ -1,3-1,4-glucanase | cellulose         |
| AG1IA_00256    | GH3           | $\beta$ -1,4-glucosidase                     | cellulose         |
| AG1IA_09735    | GH17          | $\beta$ -1,3glucosidase                      | cellulose         |
| AG1IA_05285    | GH5           | $\beta$ -1,4-endoglucanas                    | cellulose         |
| AG1IA_01218    | GH3           | $\beta$ -1,4-glucosidase                     | cellulose         |
| AG1IA_02923    | GH5           | $\beta$ -1,4-endoglucanas                    | cellulose         |
| AG1IA_06159    | GH7           | Cellobiohydrolase                            | cellulose         |
| AG1IA_02003    | GH3           | $\beta$ -1,4-glucosidase                     | cellulose         |
| AG1IA_08771    | GH5           | $\beta$ -1,4-endoglucanas                    | cellulose         |

|             |       |                                  |               |
|-------------|-------|----------------------------------|---------------|
| AG1IA_05561 | GH17  | $\beta$ -1,3glucosidase          | cellulose     |
| AG1IA_07901 | GH95  | $\alpha$ -fucosidase             | hemicellulose |
| AG1IA_06464 | GH115 | $\alpha$ -glucuronidase          | hemicellulose |
| AG1IA_06014 | GH51  | $\alpha$ -arabinofuranosidase    | hemicellulose |
| AG1IA_05653 | GH51  | $\alpha$ -arabinofuranosidase    | hemicellulose |
| AG1IA_09291 | GH16  | $\beta$ -1,4-galactosidase       | hemicellulose |
| AG1IA_01054 | GH35  | $\beta$ -1,4-galactosidase       | hemicellulose |
| AG1IA_01811 | GH28  | Endo-/exo-(rhamno)galacturonases | pectin        |
| AG1IA_04015 | GH43  | $\beta$ -1,4-xylosidase          | pectin        |
| AG1IA_09356 | PL1   | Pectin lyase                     | pectin        |
| AG1IA_02234 | GH28  | Endo-/exo-(rhamno)galacturonases | pectin        |
| AG1IA_07255 | GH18  | chitinase                        | chitin        |
| AG1IA_07247 | GH18  | chitinase                        | chitin        |
| AG1IA_09176 | GH13  | $\alpha$ -amylase                | Starch        |
| AG1IA_06735 | GH13  | $\alpha$ -amylase                | Starch        |
| AG1IA_00910 | GH13  | $\alpha$ -amylase                | Starch        |
| AG1IA_04992 | GH15  | glucoamylase                     | Starch        |
| AG1IA_02936 | GH16  | $\beta$ -1,4-galactosidase       | starch        |
| AG1IA_08014 | GH32  | Inulinase                        | Inulin        |

**Table S9. Putative differentially expressed up-regulated CAZyme genes involved in plant cell wall degradation of *R. solani* AG1IA based on the CAZy database (<http://www.cazy.org>).**

| <b>Gene ID</b>      | <b>Premier</b>               |
|---------------------|------------------------------|
| AG1IA_03552 forward | 5' GAACAGTCGAACAAAGTGGAGT 3' |
| AG1IA_03552 reverse | 5' GCCGGAACAGTGTTGGTG3'      |

**Table S10. Primers used in validation of AS.**

| <b>Gene ID</b>      | <b>Primer</b>               |
|---------------------|-----------------------------|
| AG1IA_07681 forward | 5'GGAAGCCATCGAGGTCACAT 3'   |
| AG1IA_07681 reverse | 5'TGGTCGAAAGAGTTGACGCC 3'   |
| AG1IA_07285 forward | 5'GCGGACGGAAATGGACAC 3'     |
| AG1IA_07285 reverse | 5'CACCCAGTTGATACCTGAGATG 3' |
| AG1IA_01651 forward | 5'CTGGCAATCTGCTACGGTCA3'    |
| AG1IA_01651 reverse | 5'TAGTGAAAGCGGCGCAAGAA3'    |
| AG1IA_09202 forward | 5'TTGCTCGCTTGCTCTGCC 3'     |
| AG1IA_09202 reverse | 5'CCGATTCACCAACAGTAGCC 3'   |
| AG1IA_08167 forward | 5'TCTTGCGGTCACAGTTTCG 3'    |
| AG1IA_08167 reverse | 5'CGTCTTCGTCGTCCCATT 3'     |
| AG1IA_06011 forward | 5'ACTTCCATAGACGGTCAGC 3'    |
| AG1IA_06011 reverse | 5'CTACATTCCGAGGCGATT 3'     |
| AG1IA_09369 forward | 5'GACCGAGTAAACGCCAGTG 3'    |
| AG1IA_09369 reverse | 5'AGTATCCGGCTTCCATCC 3'     |
| AG1IA_09664 forward | 5'CTGCATGTGAGCGTTATGGC      |
| AG1IA_09664 reverse | 5'ATAGATGGCTTTCGGTGCGT      |

|                     |                           |
|---------------------|---------------------------|
| AG1IA_01129 forward | 5'CTGGCTATGTTGGAACGGGT3'  |
| AG1IA_01129 reverse | 5'TTCGTCACGGTAAAGCACCA3'  |
| AG1IA_05374forward  | 5'AAGGCGCAGAGAAGTTCGAG3'  |
| AG1IA_05374 reverse | 5'GACGACGCTGTATTTGGGGA3'  |
| AG1IA_08104 forward | 5'GCGGGGA ACTATAGCTGGTC3' |
| AG1IA_08104 reverse | 5'CTTCGGTGCCCATGCAGATA3'  |
| AG1IA_01042 forward | 5'TGCCTGCGGTTGTGCTATAA3'  |
| AG1IA_01042 reverse | 5'CCATCGCCTCGATTCCAAT3'   |
| 18S forward         | 5'AATTCCAGCTCCAATAGCGT3'  |
| 18S reverse         | 5'TACATACCGTGAGGCAGACC3'  |

---

**Table S11. RT-qPCR primers used in gene expression validation.**

## Supplementary figures

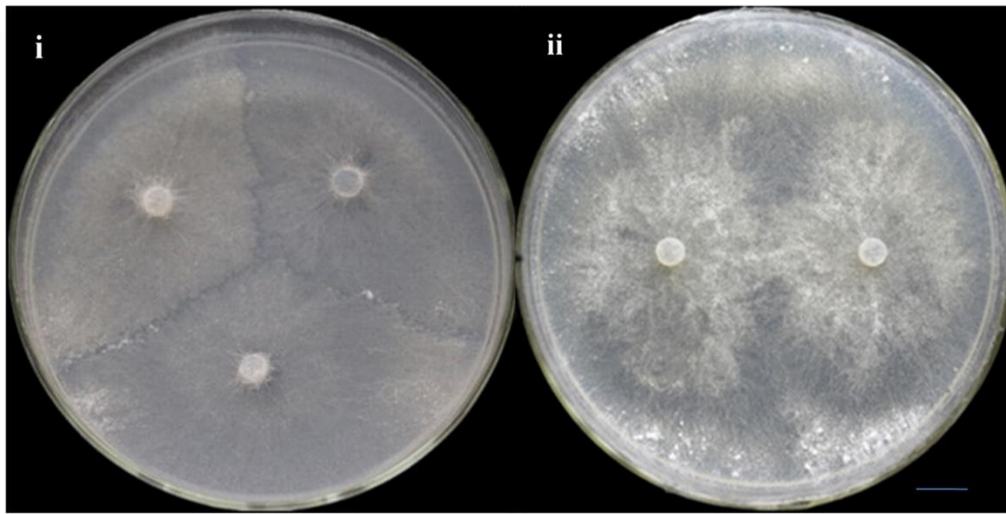

**Figure S1. Somatic compatibility reactions of *R. solani* AG1 IA ecotypes.** Somatic compatibility reactions of *R. solani* AG1 IA ecotypes on potato-dextrose agar (PDA). Scale bars, 2 cm. (i) Somatically incompatible intermediate interactions in rice IA, maize IA and soybean IA. (ii) Somatically compatible interactions in rice IA-rice IA.

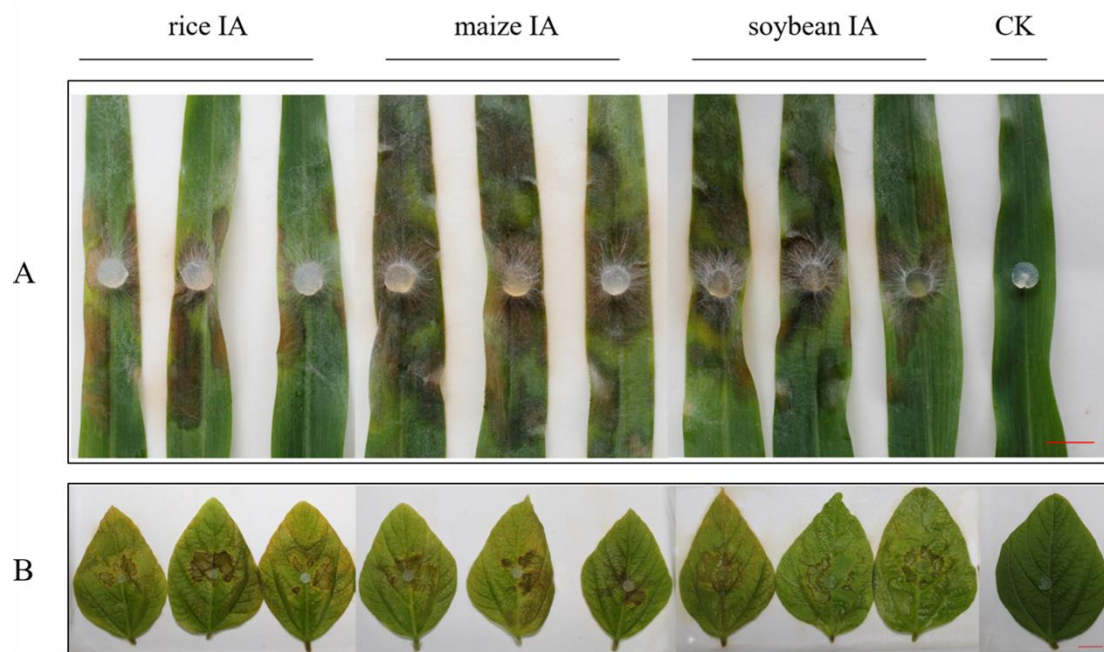

**Figure S2 Pathogenic phenotype of rice IA, maize IA and soybean IA during the infection of maize and soybean.** Area of spots caused by rice IA, maize IA and soybean IA at 48 hpi for maize (A) and soybean (B), respectively. Spot areas caused by maize IA were significantly more severe than spots caused by rice IA and soybean IA during infection of maize. Scale bars, 1 cm.



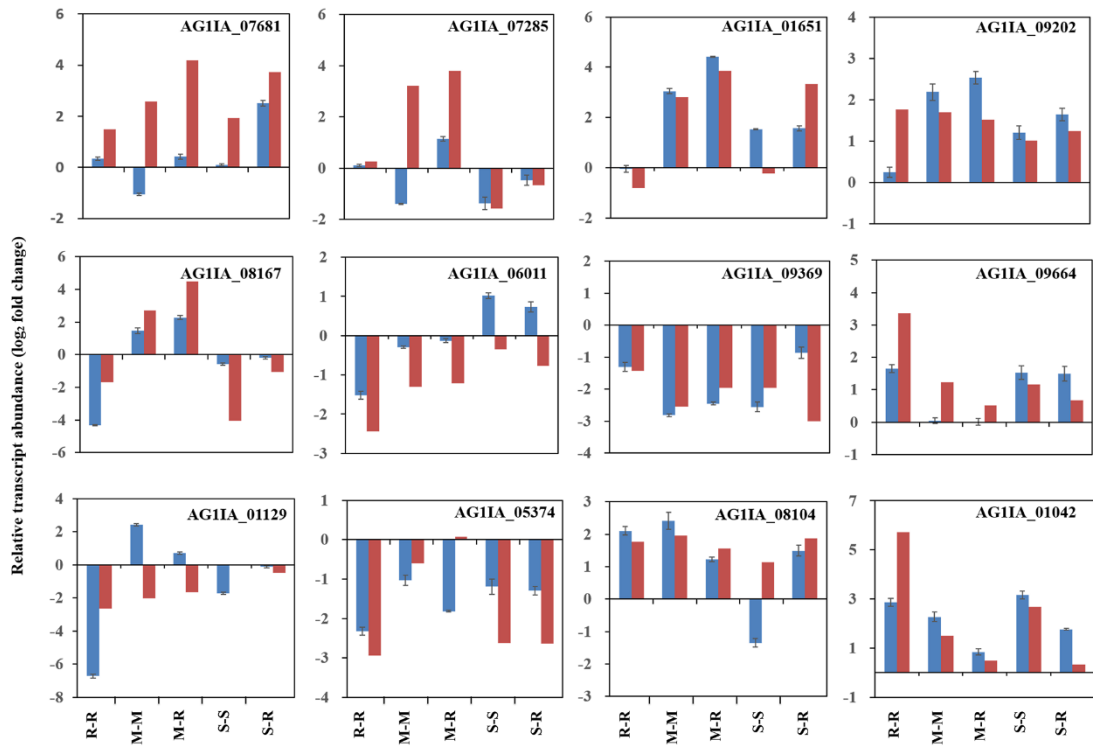

**Figure S3. Validation of RNA-Seq data *via* qRT-PCR.** Histogram depicting relative transcript abundance of selected transcripts in strains during different host infections. All data points are represented as  $\log_2$  fold change values. R-R was calculated using R0 as a reference, and expression under M-M, M-R, S-S and S-R was calculated with respect to control conditions for each cultivar (M0 and S0). Genes belonging to different categories, such as secreted proteins (*AGIIA\_01042* and *AGIIA\_01651*), candidate effectors (*AGIIA\_07285* and *AGIIA\_09664*), CAZymes (*AGIIA\_01129* and *AGIIA\_08104*) and cytochrome P450 (*AGIIA\_08032* and *AGIIA\_05374*), are included. The blue columns represent expression *via* qRT-PCR, and red columns represent the expression *via* RNA-Seq. Error bars,  $\pm$  SE of the means of the raw data.

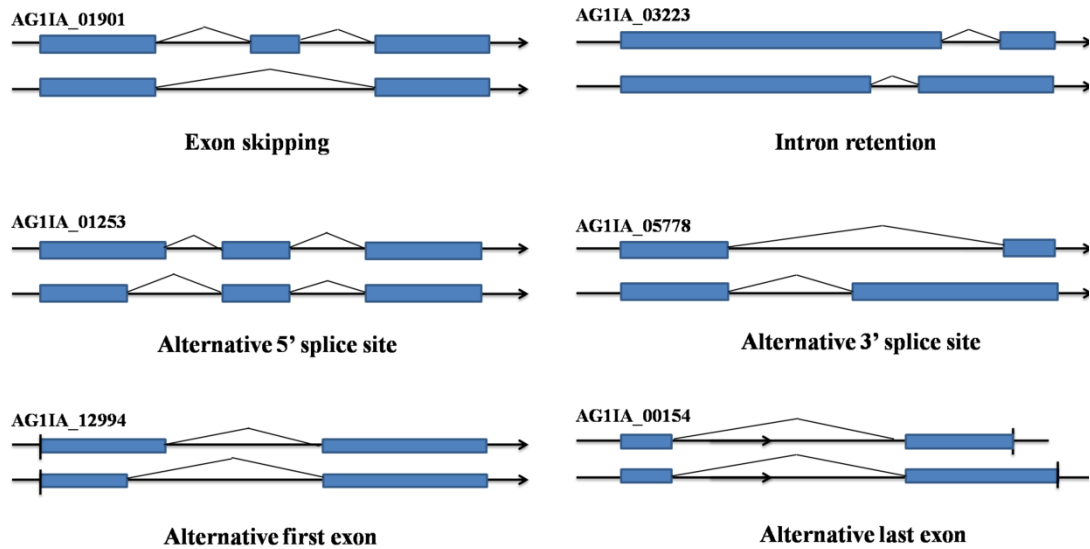

**Figure S4. Predicted models of six types of alternative splicing events.** Some predicted genes in M-M are listed, including *AG11A\_01901* (exon skipping), *AG11A\_03223* (intron retention), *AG11A\_01253* (alternative 5' splice site), *AG11A\_05778* ((alternative 3' splice site), *AG11A\_12994* (alternative first exon) and *AG11A\_00154* (alternative last exon).

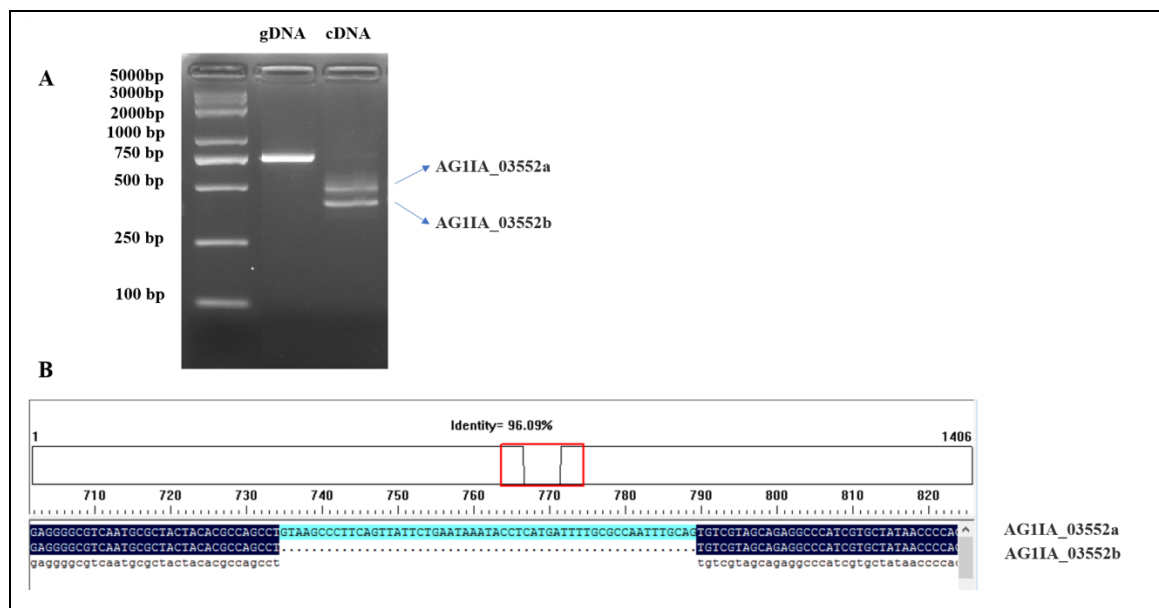

**Figure S5. Identification of alternatively spliced genes.** (A) *AG11A\_03552* with intron retention was selected for confirmation by RT-PCR in R-R. Genomic DNA template (middle lane) was used as a control. Primers were designed for flanking intronic regions. (B) DNAMAN was used for sequencing alignment. An intron is retained in *AG11A\_03552a* compared to *AG11A\_03552b*.

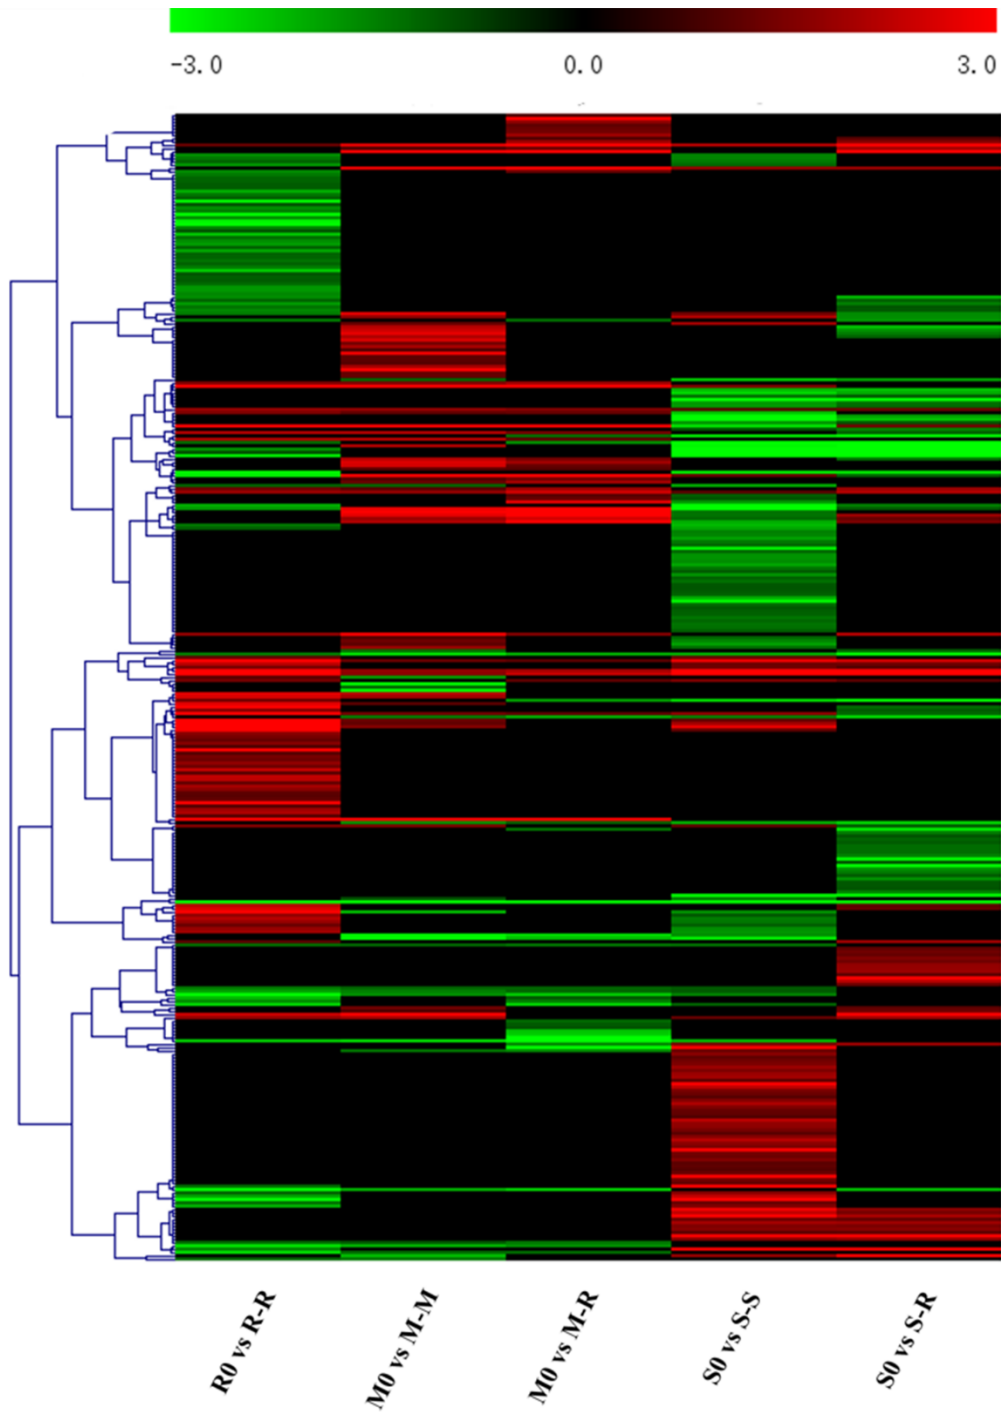

**Figure S6. Differential expression of secreted proteins of *R. solani* AG1 IA during infection of different hosts.** In total, 347 DEGs of secreted proteins were analysed by prediction algorithms; a hierarchical clustering statistic method based on Pearson's correlation (correlation $\geq$ 98%) and average linkage was used. Red indicates a significant increase in gene expression, black indicates no change in expression and green indicates a significant decrease in gene expression ( $|\log_2\text{FC}|\geq 1$ ). Colour scale represents log<sub>2</sub> fold

change values from -3 to 3.
